# Supplementary material for: Inoculating plant growth-promoting bacteria and arbuscular mycorrhiza fungi modulates rhizosphere acid phosphatase and nodulation activities and enhance the productivity of soybean (Glycine max)
Source: PubMed Central journal article supplement (PMC9549076; doi:10.3389/fpls.2022.934339), 2022-09-26
Supplement: Table_1.pdf [file Table_1.pdf]

## Supplementary data

**Table S1.** Soybean root nodulation as affected by inoculation of plant growth-promoting bacteria (PGPB) and arbuscular mycorrhiza fungi (AMF), with or without addition of nitrogen (N), phosphorus (P) and potassium (K) fertilizers.

| Treatments   | Nodulation rating | Volume of nodules/plant (mL) | Nodule dry weight (g) |
|--------------|-------------------|------------------------------|-----------------------|
| Control      | 4.73 ± 1.15b      | 0.16 ± 0.02c                 | 0.017 ± 0.002b        |
| PGPB         | 9.80 ± 1.11a      | 0.34 ± 0.05a                 | 0.037 ± 0.003a        |
| AMF          | 7.40 ± 0.72a      | 0.23 ± 0.05b                 | 0.021 ± 0.002b        |
| PGPB+AMF     | 10.20 ± 0.53a     | 0.39 ± 0.02a                 | 0.036 ± 0.001a        |
| PGPB+N       | 10.40 ± 1.22a     | 0.35 ± 0.01a                 | 0.035 ± 0.002a        |
| PGPB+PK      | 9.67 ± 1.68a      | 0.39 ± 0.03a                 | 0.037 ± 0.002a        |
| PGPB+NPK     | 10.20 ± 1.22a     | 0.39 ± 0.02a                 | 0.038 ± 0.002a        |
| PGPB+AMF+N   | 9.80 ± 0.92a      | 0.34 ± 0.02a                 | 0.036 ± 0.003a        |
| PGPB+AMF+PK  | 10.33 ± 0.64a     | 0.37 ± 0.03a                 | 0.035 ± 0.003a        |
| PGPB+AMF+NPK | 9.73 ± 1.10a      | 0.40 ± 0.01a                 | 0.038 ± 0.001a        |

Data (Mean ± SD) within columns with different letters are significantly different (Tukey's HSD,  $P < 0.05$ ).
